# Supplementary material for: IL-1 Generated by Oral Squamous Cell Carcinoma Stimulates Tumor-Induced and RANKL-Induced Osteoclastogenesis: A Possible Mechanism of Bone Resorption Induced by the Infiltration of Oral Squamous Cell Carcinoma
Source: MDPI journal article supplement (doi:10.3390/ijms24010688), 2022-12-30
Supplement: s1 [file s1]

## Supplementary Materials

(a)

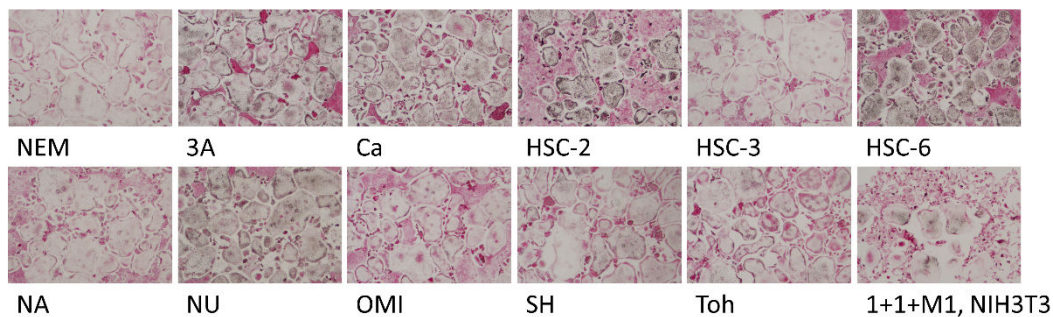

(b)

OPG

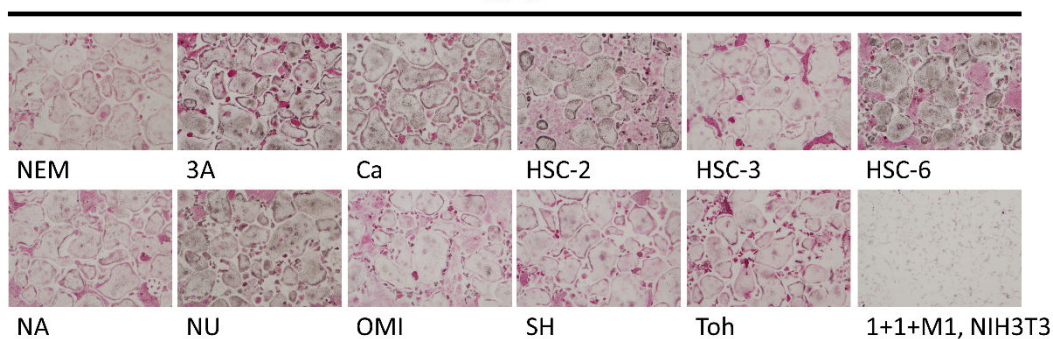

**Figure S1.** Representative views of TRAP staining 5 days after the coculture of various kinds of OSCC cells with OPCs. (a) OSCC cell lines, NEM, 3A, Ca, HSC-2, HSC-3, HSC-6, NA, NU, OMI, SH, or Toh were cocultured with OPCs. As a control, 1+1+M1, NIH3T3 cells overexpressing human RANKL and mouse M-CSF were also cocultured with OPCs. (b) For some of these cultures, OPG was further added to evaluate the effects of the RANKL inhibitor on osteoclastogenesis.

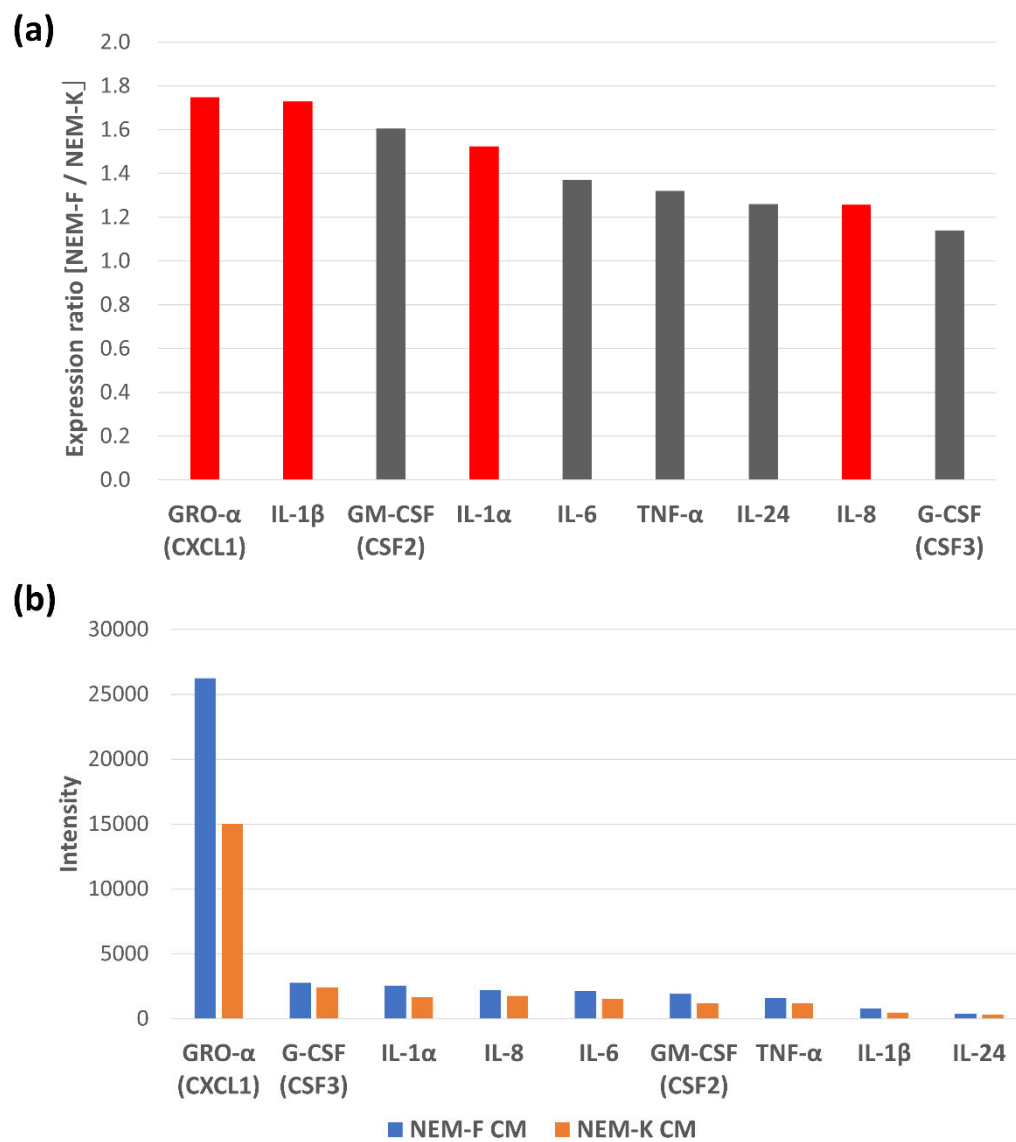

**Figure S2.** Results of protein array analysis between culture supernatants of NEM-F and NEM-K. Red bars represent the selected inflammatory cytokines based on the results of gene expression microarray analysis. Expression ratio (A) and intensity (B) in NEM-F relative to that in NEM-K.

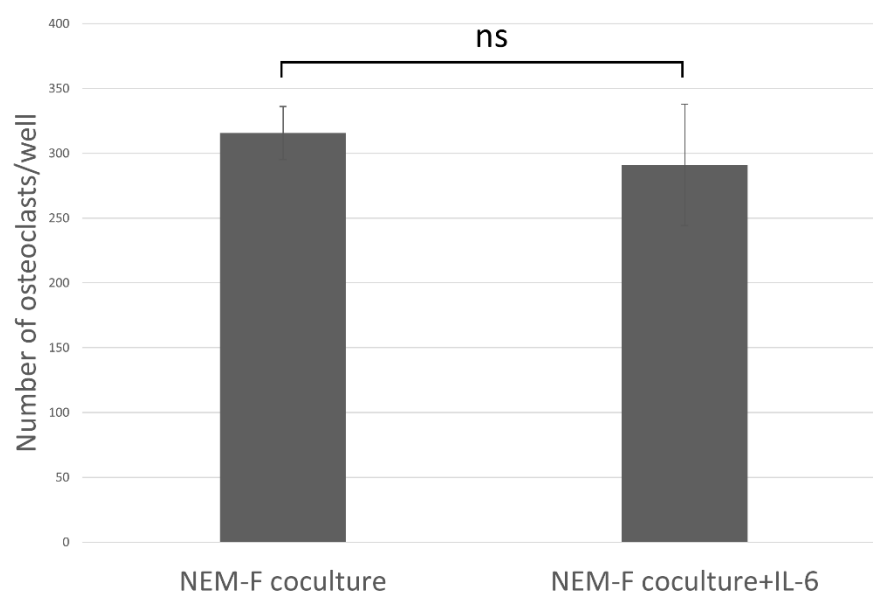

**Figure S3.** Quantitative data on the number of osteoclasts induced by the coculture of NEM-F cells with OPCs with or without supplementation of IL-6. Ns: not significant (Student's *t*-test).

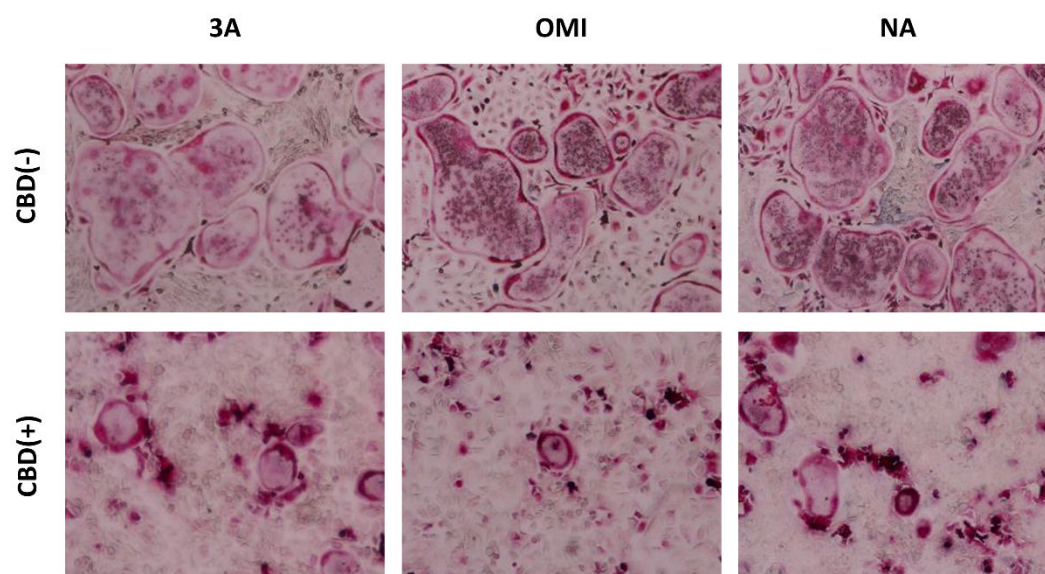

**Figure S4.** Representative views of TRAP staining 5 days after the coculture of OSCC cell line, 3A, OMI, or NA with OPCs with or without supplementation of CBD.
